# Supplementary material
Source: publisher site journal article supplement (https://www.dovepress.com/article/321893)
Supplement: Supplementary file 1 [file get_supplementary_file.php]

**Appendix A**

*Calculated MMAT Scores for Studies included in this Systematic Review*

| **Study** | **MMAT Score** |
| --- | --- |
| *Chang 2016 37* | 4 | |
| *Ryu 1993 47* | 5 | |
| *El-Assal 2003 11* | 5 | |
| *Bombaci 2016 12* | 4 | |
| *Glasgow 1993 23* | 4 | |
| *Haklar 2014 40* | 5 | |
| *Howe 2007 41* | 4 | |
| *Hulet 1998 61* | 5 | |
| *Keating 1991 62* | 3 | |
| *Maffulli 199139* | 5 | |
| *Nemec 1994 60* | 3 | |
| *Mills 1993 26* | 4 | |
| *Passler 1993 1* | 3 | |
| *Parisien 1990 63* | 5 | |
| *Dai 2018 38* | 5 | |
| *Reagan 1989 48* | 5 | |
| *Iorio 2019 42* | 5 | |
| *Tudisco 2000 14* | 4 | |
